# Supplementary material for: Genome-wide identification of CAMTA gene family members in Medicago truncatula and their expression during root nodule symbiosis and hormone treatments
Source: Front Plant Sci. 2015 Jun 19;6:459. doi: 10.3389/fpls.2015.00459 (PMC4472986; doi:10.3389/fpls.2015.00459)
Supplement: Supplementary file 4 [file Table4.XLS]

## Sheet: Sheet1
Table S4 Analysis of the CG-box in the promoters of rhizobial infection response genes.
GB Accession	Locus ID	Gene description	Ratio of intensities (inoculated/uninoculated)	Time points	Numbers of CAMTA binding sites	Numbers of ABA-responsive elements
AW775524	Medtr3g035600	photosystem I P700 chlorophyll A apoprotein A2	7.64	1hpi	1	0
BG646103	Medtr3g103580	branched-chain amino acid aminotransferase	5.75	1hpi	1	0
AW256478	Medtr4g051430	50S ribosomal protein L2	5.74	1hpi	1	0
AW775628	Medtr4g082900	hypothetical protein	5.51	1hpi	1	0
BG587871	Medtr8g068040	legume lectin beta domain protein	3.69	1hpi	1	0
BG645487	Medtr8g030920	acyl-CoA thioesterase	3.59	1hpi	2	0
BF520021	Medtr4g094610	LRR receptor-like kinase family protein	3.56	1hpi	1	0
BG454407	Medtr7g093140	late embryogenesis abundant protein	3.49	1hpi	1	1
BF643197	Medtr3g035130	long-chain acyl-CoA synthetase	2.83	1hpi	1	0
BG580581	Medtr3g028450	transmembrane protein, putative	2.81	1hpi	1	1
BE998487	Medtr7g108650	SPO/MBR family protein	2.74	1hpi	1	0
BG586624	Medtr3g028490	hypothetical protein	2.73	1hpi	1	0
BF006274	Medtr4g073530	senescence/dehydration-associated-like protein	2.54	1hpi	2	1
AW299027	Medtr2g080260	root cap/late embryogenesis related	3.8	6hpi	2	0
BG587877	Medtr1g092880	hippocampus abundant transcript-like protein	2.98	6hpi	1	1
AW559759	Medtr3g088440	NRAMP metal ion transporter 6	2.94	6hpi	2	0
BG587203	Medtr4g113100	LRR receptor-like kinase	2.74	6hpi	1	0
BQ165450	Medtr4g033015	isoflavone-7-O-methyltransferase	2.72	6hpi	1	0
BG585061	Medtr3g089070	EF hand calcium-binding family protein	0.4	6hpi	1	0
BG647222	Medtr5g077510	Avr9/Cf-9 rapidly elicited protein	0.4	6hpi	2	1
AW559557	Medtr4g063310	transmembrane protein, putative	0.39	6hpi	1	0
AW775221	Medtr2g436100	RING-H2 zinc finger protein	0.36	6hpi	2	0
BG582276	Medtr3g078800	late embryogenesis abundant hydroxyproline-rich glycoprotein, putative	0.36	6hpi	1	0
BG648594	Medtr3g467420	glutathione S-transferase, amine-terminal domain protein	0.36	6hpi	1	0
BF003983	Medtr3g092640	membrane-related protein CP5, putative	0.36	6hpi	1	0
BF520556	Medtr4g082900	hypothetical protein	0.35	6hpi	1	0
BG646103	Medtr3g103580	branched-chain amino acid aminotransferase	0.35	6hpi	1	0
AW776895	Medtr7g073430	WRKY transcription factor	0.32	6hpi	2	0
BG585659	Medtr8g107110	EF hand calcium-binding family protein	0.31	6hpi	1	0
AW267866	Medtr4g091100	F-box SKIP27-like protein	0.28	6hpi	1	1
BE998487	Medtr7g108650	TSPO/MBR family protein	0.2	6hpi	1	0
AW299027	Medtr2g080260	root cap/late embryogenesis related	2.57	12hpi	2	0
BE998487	Medtr7g108650	TSPO/MBR family protein	0.34	12hpi	1	0
BG645392	Medtr1g115900	cationic peroxidase	6.37	24hpi	1	0
AW775758	Medtr5g097910	aldo/keto reductase family oxidoreductase	4.96	24hpi	1	0
BG581077	Medtr8g087425	glutathione S-transferase	4.26	24hpi	1	0
BG645320	Medtr8g098910	monodehydroascorbate reductase	3.83	24hpi	2	1
BE942029	Medtr7g077323	Serine proteinase inhibitor	0.34	24hpi	1	0
AW775926	Medtr2g079990	Jasmonic acid 2	0.31	24hpi	1	1
BF633101	Medtr5g043285	transmembrane protein, putative	0.26	24hpi	1	0
BE239986	Medtr1g066530	albumin-2 protein	0.26	24hpi	1	1
AW775628	Medtr4g082900	hypothetical protein	0.23	24hpi	1	0
BG646103	Medtr3g103580	branched-chain amino acid aminotransferase	0.22	24hpi	1	0
BG645392	Medtr1g115900	cationic peroxidase	2.16	48hpi	1	0
BE239986	Medtr1g066530	albumin-2 protein	0.25	48hpi	1	1
BG645320	Medtr8g098910	monodehydroascorbate reductase	0.39	72hpi	2	1
